# Supplementary material for: Understanding the temperature-dependent charge transport, structural variation and photoluminescent properties in methylammonium lead halide perovskite single crystals
Source: Royal Society of Chemistry journal article supplement (doi:10.1039/c8tc01717d), 2018-01-01
Supplement: c8tc01717d1.pdf [file c8tc01717d1.pdf]

## Supporting information

### Understanding Temperature-Dependent Charge Transport, Structural Variation and Photoluminescent Properties in Methylammonium Halide Perovskite Single Crystals

Jiyu Zhou, Na Lei, Huiqiong Zhou\*, Yuan Zhang\*, Zhiyong Tang, and Lei Jiang

**Keyword:** MAPbI<sub>3</sub> single crystal, phase transition, charge carrier mobility, traps, temperature dependence

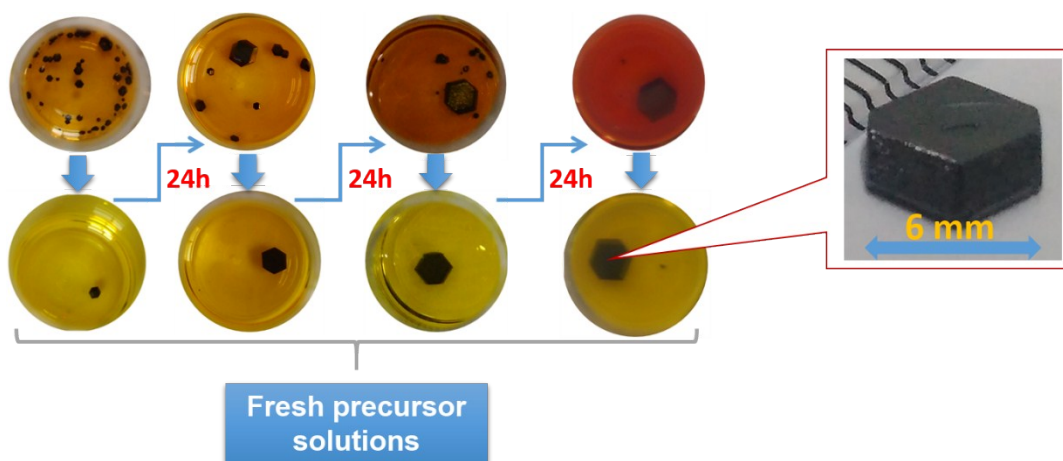

**Figure S1.** Evolution of the growth of MAPbI<sub>3</sub> single crystals. The pictures in the bottom show the crystalizing samples soaked in fresh precursor solutions which are changed every 12 h for totally three times. Also shown in the right is the photo of finished MSC with a size up to 6 mm in diagonal and 3 mm in thickness.

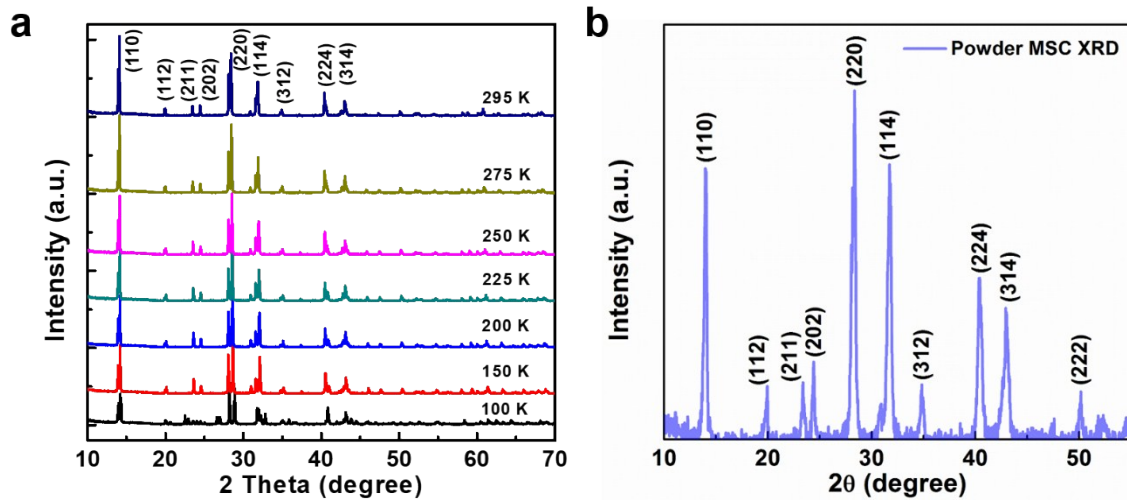

**Figure S2.** (a) Snapshot of powder XRD patterns for MSC measured at different temperature ( $T$ ). (b) Zoomed-in XRD pattern at 300 K.

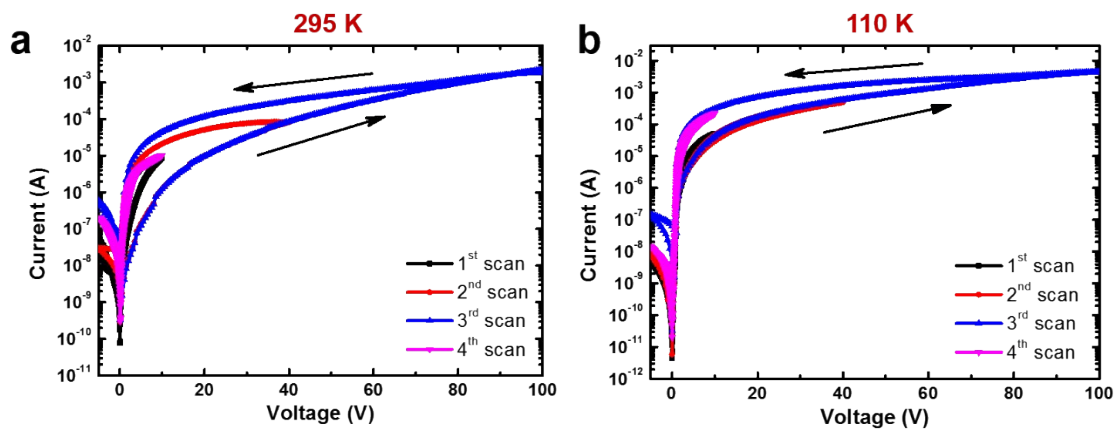

**Figure S3.**  $I$ - $V$  characteristics of MSC HO devices scanned in both upward and downward directions at (a) 295K, and (b) 110K.

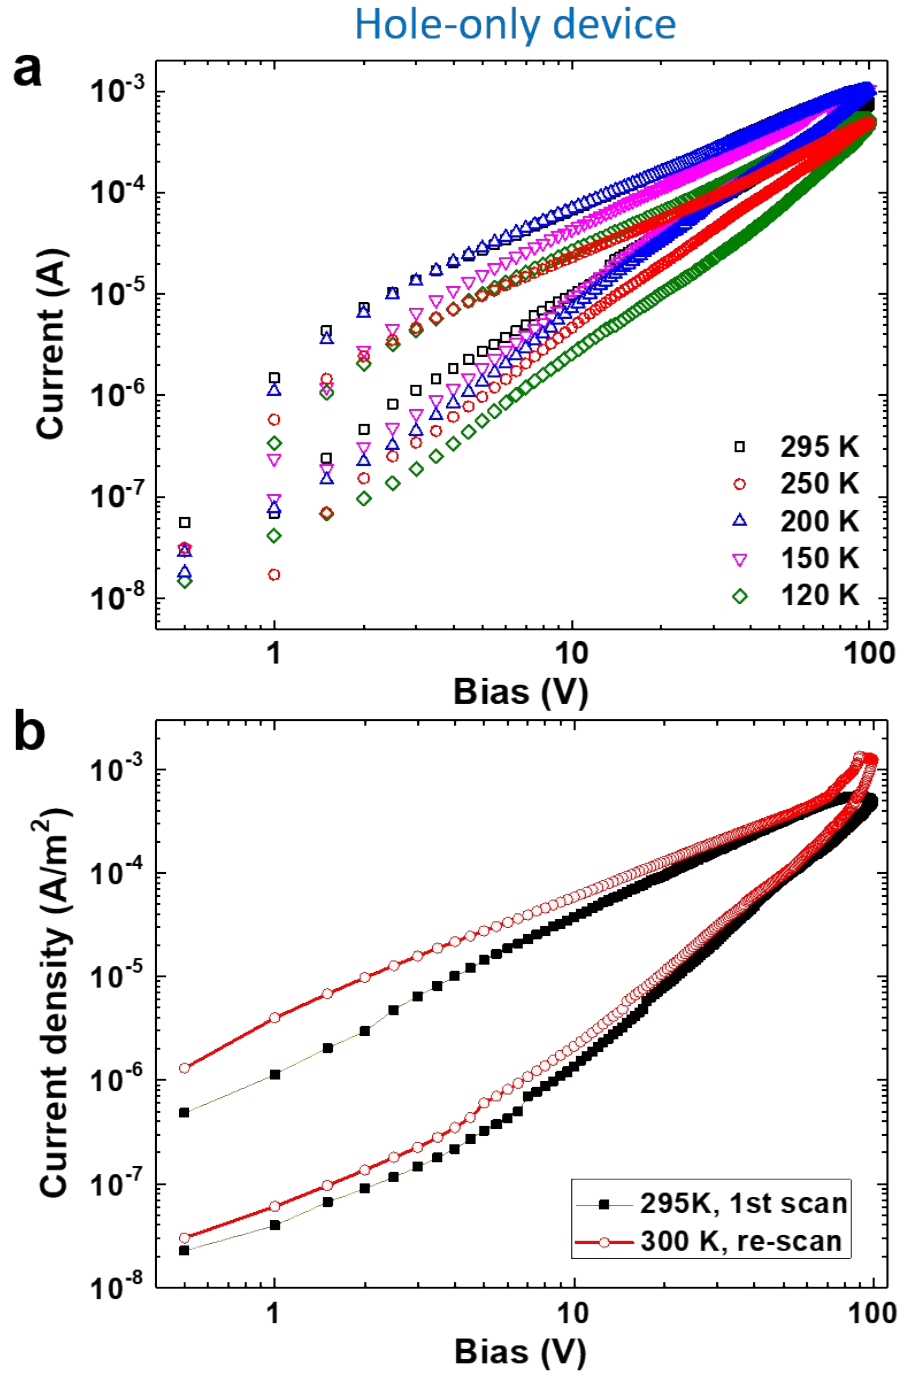

**Figure S4.** (a)  $I$ - $V$  characteristics (double-logarithm scale) of MSC HO devices scanned in both upward and downward directions at different  $T$ . (b) Compared  $I$ - $V$  characteristics of initial scan at RT and re-scan after  $T$ -cycling at 300 K.

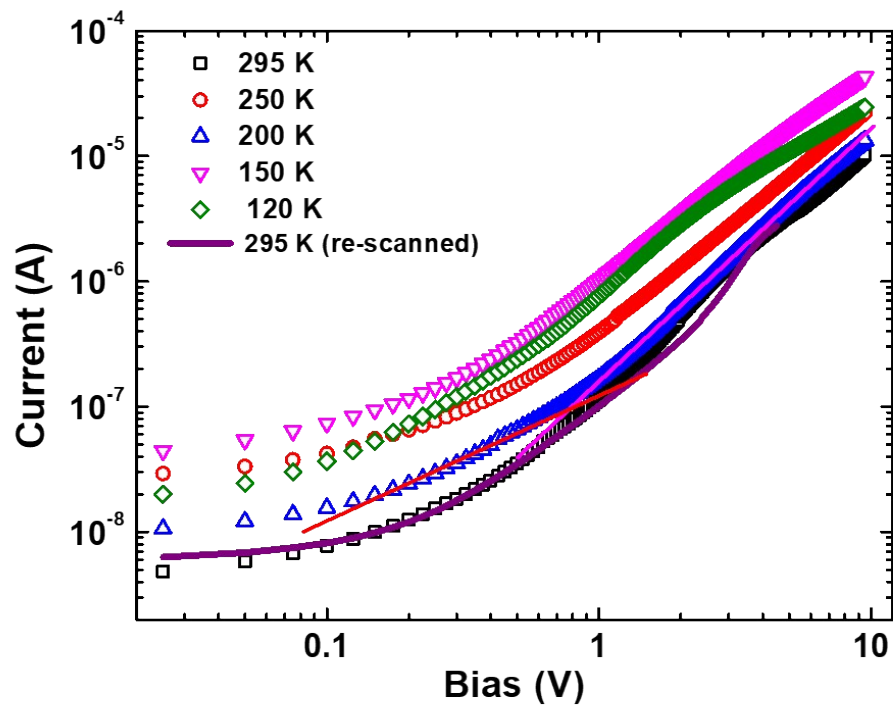

**Figure S5.**  $I$ - $V$  characteristics (upward scan) of MSC HO devices in scanned with low biases (up to 10 V) in double-logarithm scale. Also compared is the  $I$ - $V$  curve at 295 K after the cooling to heating cycle (solid purple line) which overlaps with the initial measurement, indicating a  $T$ -reproducibility. Lines in red and pink are guidance to the eye with a slope of 1 and 2, respectively.

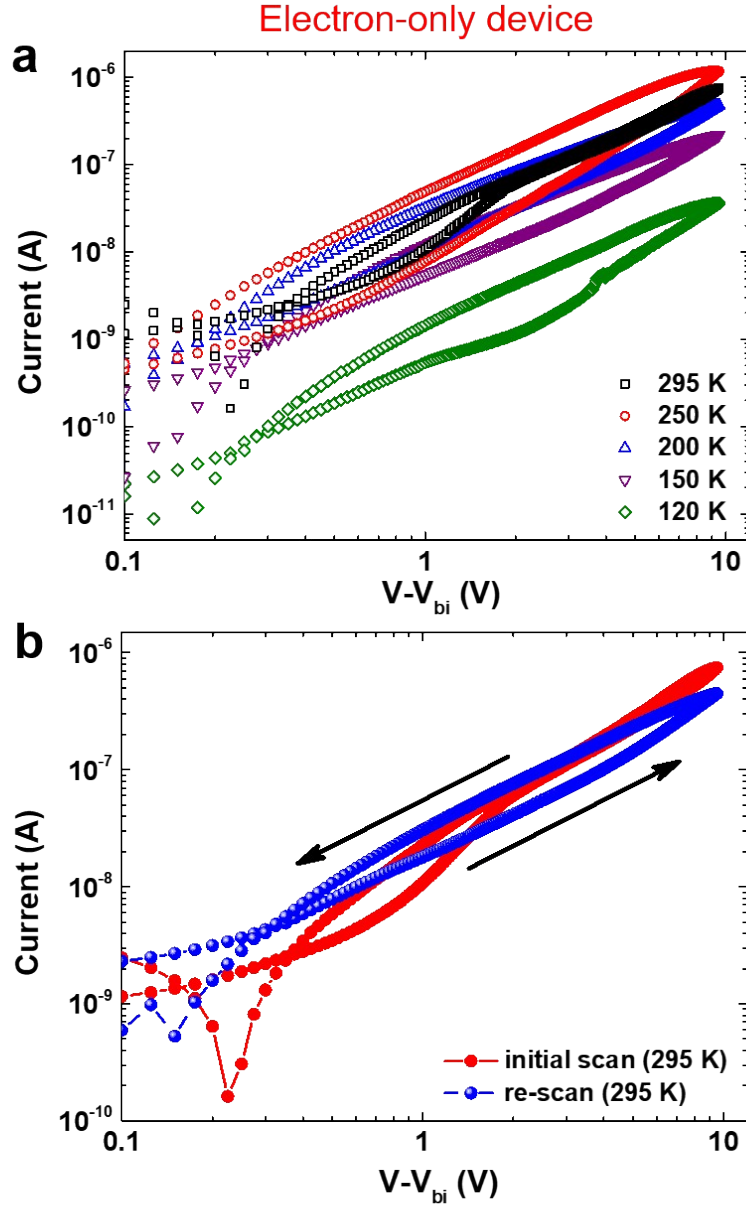

**Figure S6.** (a)  $I$ - $V$  characteristics (double-logarithm scale) of electron-only (EO) devices based on MSCs with hole blocking interlayers scanned in both upward and downward directions. (b) Comparison of  $I$ - $V$  curves scanned initially at 300 K and re-scanned at the same temperature after the cooling-to-heating cycle.

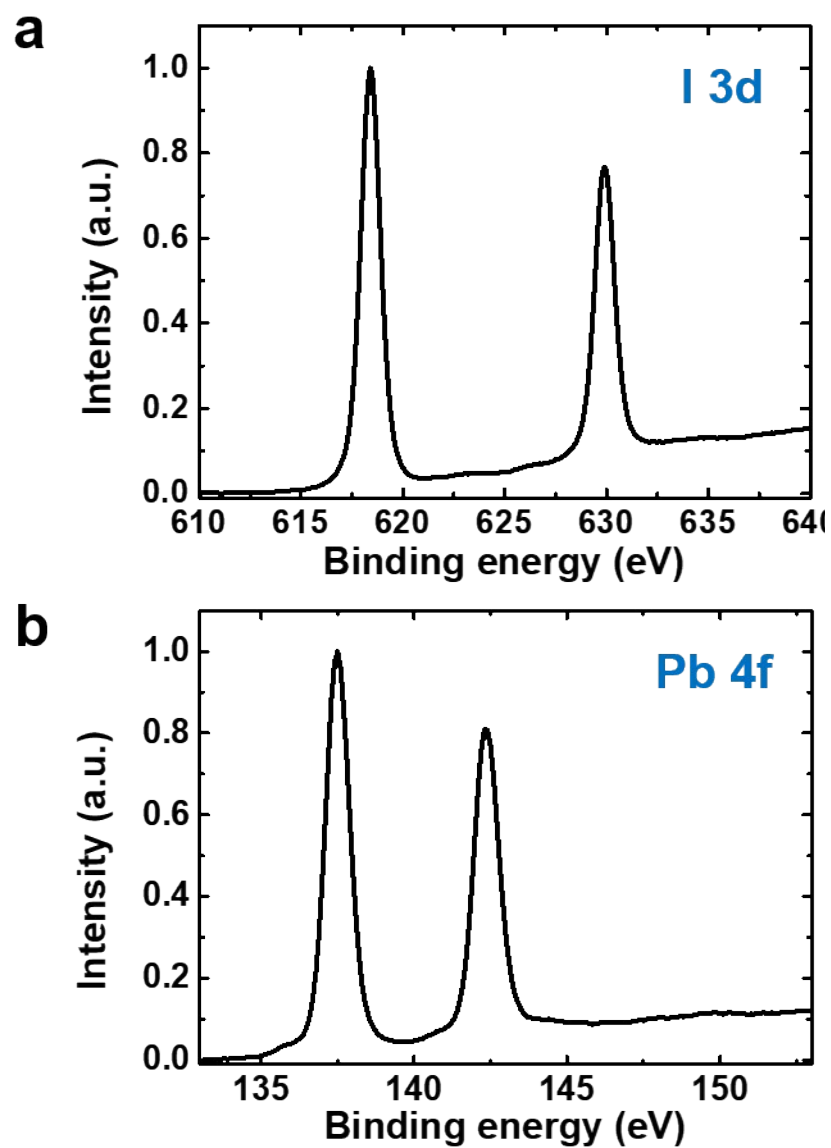

**Figure S7.** High resolution X-ray photoelectron spectra of (a) I 3d and (b) Pb 4f measured on the surface of MSCs.

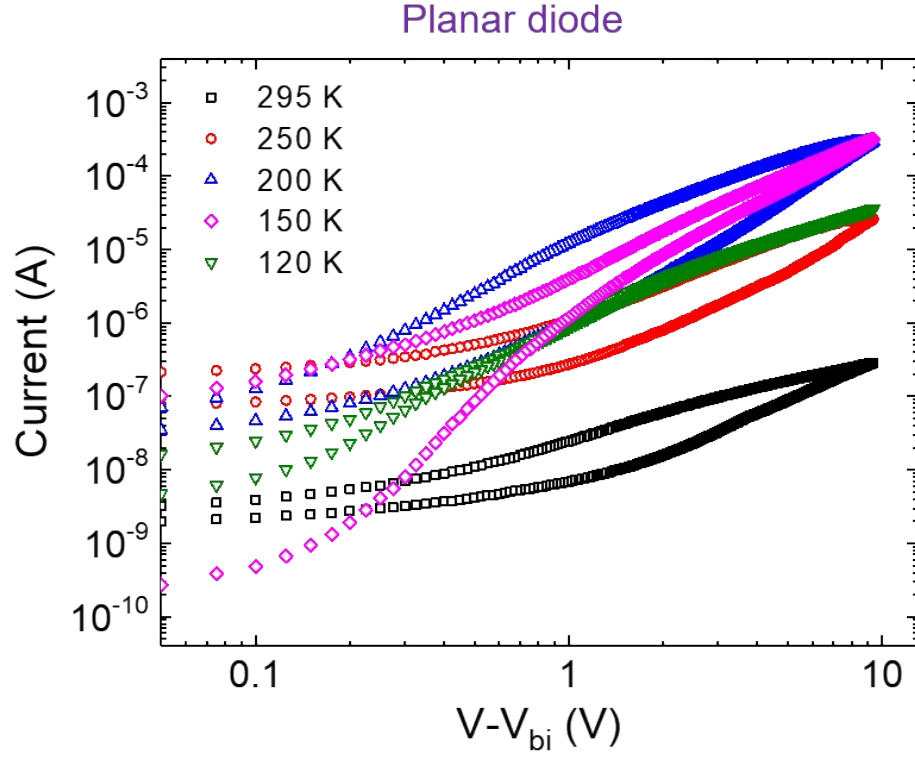

**Figure S8.**  $I$ - $V$  characteristics in double-logarithm scale of MSC planar diodes in both upward and downward scan directions.
